# Supplementary material
Source: publisher figshare collection journal article supplement (https://acs.figshare.com/ndownloader/files/5921865)
Supplement: Supplementary file 1 [file 5921865]

## Supporting Information

# One-Pot Synthesis of Diphenylalanine-Based Hybrid Nanospheres for Controllable pH- and GSH- Responsive Delivery of Drugs

Qiuju Li, Min Chen\* Daoyong Chen, Limin Wu\*

Department of Materials Science and State Key Laboratory of Molecular Engineering of Polymers, Fudan University, Shanghai 200433, China

\* Email: chenmin@fudan.edu.cn, lmw@fudan.edu.cn.

### Supporting Figures

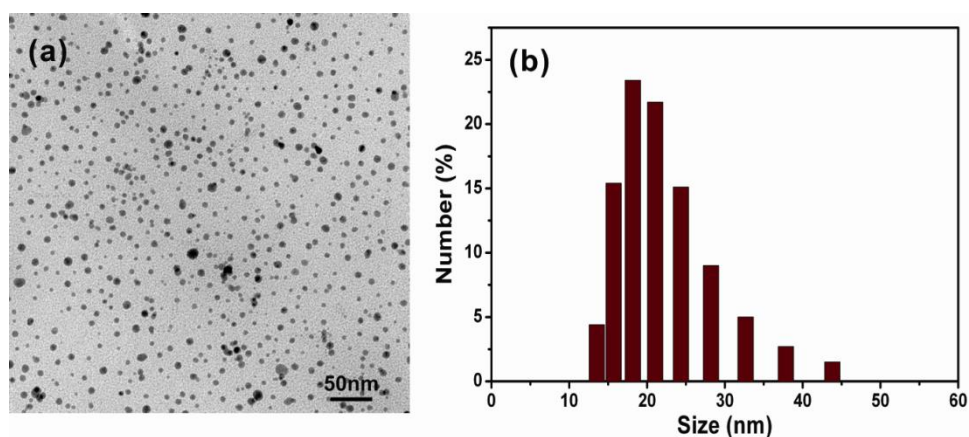

**Figure S1.** (a)TEM image and (b) size-distribution of Au NPs with ADA as reducing and stabilizing agent

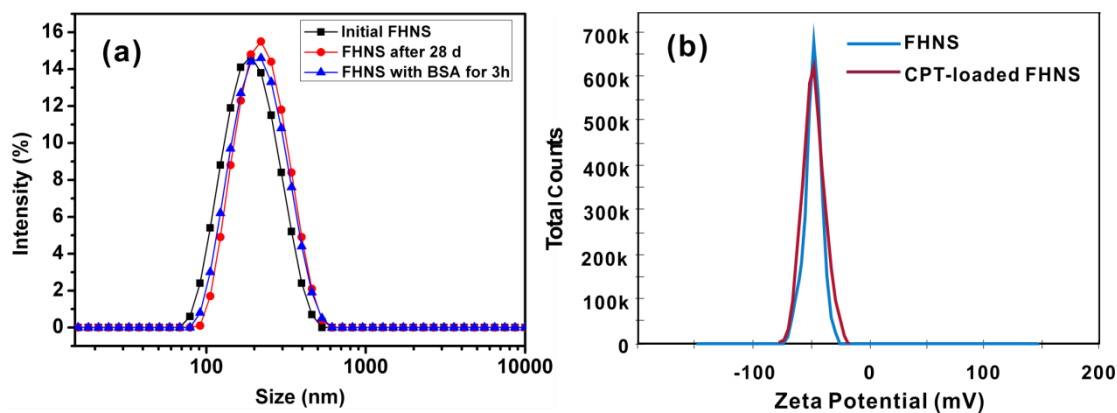

**Figure S2.** (a) Size-distribution of initial FHNS, FHNS kept for 28 days and FHNS incubated with BSA for 3 h. (b) Zeta potential of FHNS and the CPT-loaded FHNS.

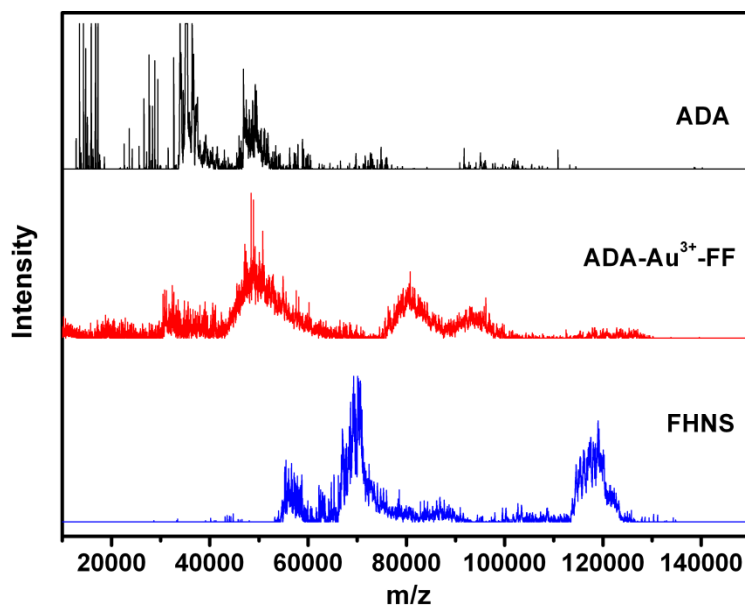

**Figure S3.** MALDI-TOF mass patterns of ADA, the mixture of ADA-Au<sup>3+</sup>-FF and the obtained FHNS.

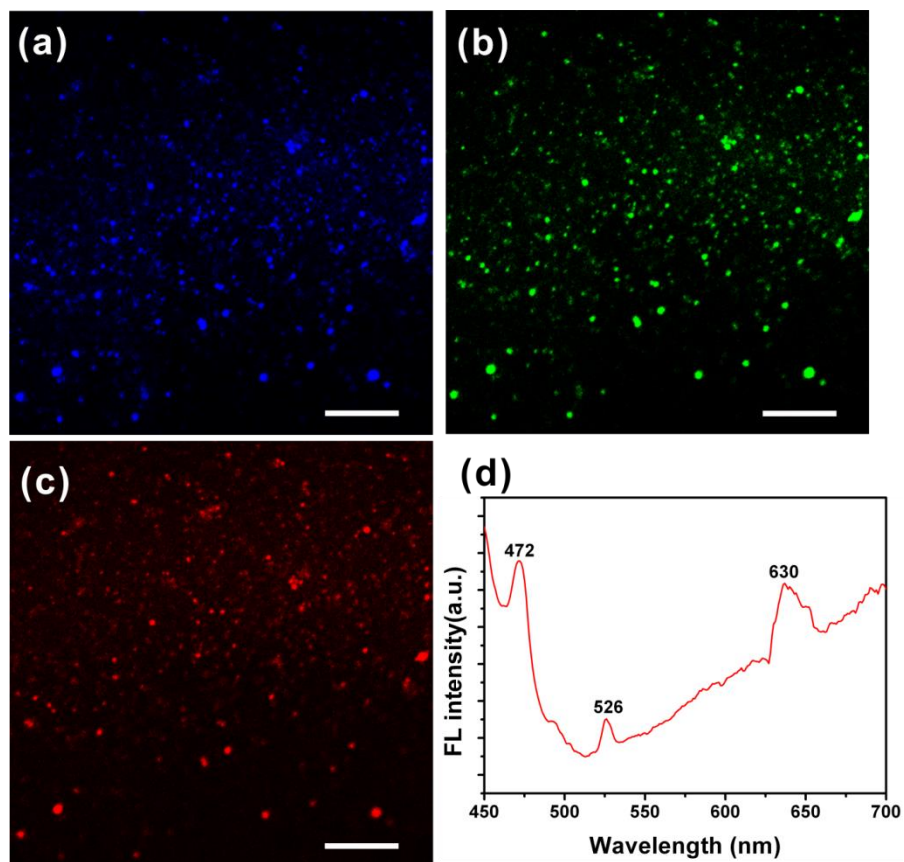

**Figure S4.** CLSM images of FHNS excited by 405 nm laser and collected at a) blue (430–480 nm), b) green (500–550 nm), and c) red (590–640 nm) channels. Scale bars are 10  $\mu\text{m}$ . d) FL spectrum of FHNS powder dispersed in water excited at 405 nm.

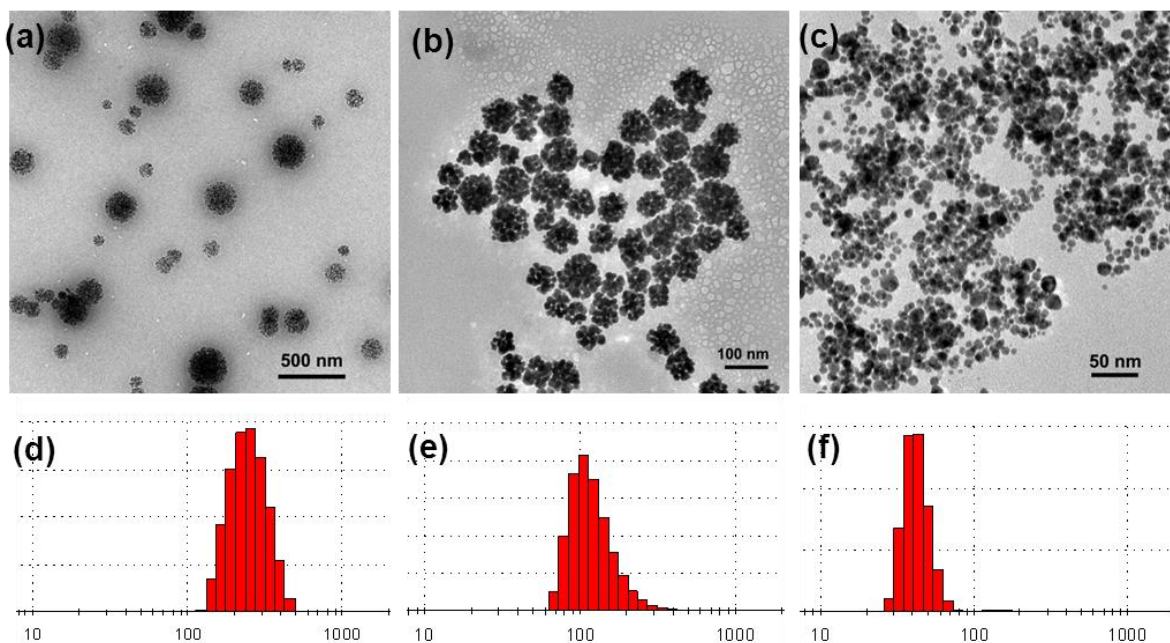

**Figure S5.** TEM images and size-distribution of (a,d) initial CPT-loaded FHNS, (b,e) incubated at pH=5.0 and (c,f) at pH=5.0 with 10 mM GSH.

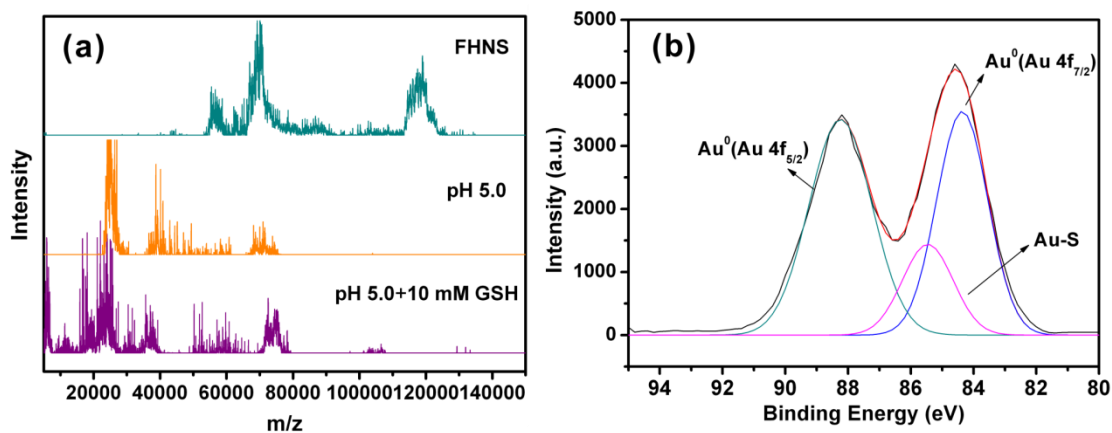

**Figure S6.** a) MALDI-TOF mass patterns of FHNS dissolved in water in the process of disassembly. b) XPS scans of Au elements in the disassembled Au NPs.
